# Supplementary material
Source: HighWire-hosted journal article supplement (https://jnis.bmj.com/content/12/3/308)
Supplement: inline-supplementary-material-2 [file inline-supplementary-material-2.docx]

Table 2 General condition of the patient, intraoperative treatment and prognosis

| Patient | Hunt-Hess Scale | AN size(mm)  L xW xH | Neck (mm) | Adjunctive Technique | AN Occlusion | Complication | MRS |
| --- | --- | --- | --- | --- | --- | --- | --- |
| 1 | I | 3.51x4.23 x3.44 | 2.23 | No | RN | No | 0 |
| 2 | II | 2.76 x2.51 x3.22 | 1.87 | No | RA | No | 0 |
| 3 | I | 4.33 x3.40 x5.27 | 2.63 | No | CO | No | 0 |
| 4 | 0 | 2.31 x2.32 x3.20 | 2.31 | stent | CO | No | 0 |
| 5 | III | 4.72 x4.13 x5.21 | 3.10 | No | RN | No | 0 |
| 6 | II | 12.13 x8.97 x9.12 | 4.55 | stent | CO | No | 0 |
| 7 | III | 6.55 x5.67 x7.32 | 3.38 | No | RN | No | 1 |
| 8 | I | 3.14 x3.38 x3.67 | 3.62 | stent | CO | No | 0 |
| 9 | II | 3.47 x3.56 x5.27 | 2.62 | No | CO | No | 0 |

AN, aneurysm; RN, residual neck; RA, residual aneurysm; CO, complete occlusion.
